# Supplementary material for: Coupling of Charge Regulation and Conformational Equilibria in LinearWeak Polyelectrolytes: Treatment of Long Range Interactions viaEffective Short-Ranged and pH-Dependent Interaction Parameters
Source: Preprints.org preprint supplement (doi:10.20944/preprints201806.0300.v1), 2018-06-19
Supplement: Supplementary file 1 [file supplementary]

Supplementary information to “Coupling of charge regulation and conformational equilibria in linear weak polyelectrolytes: treatment of long range interactions *via* effective short-ranged and pH-dependent interaction parameters”

June 15, 2018

## 1 Matricial expression for the SBRIS partition function for a linear polyelectrolyte

Let us express the SBRIS partition function as

$$\Xi_{\text{SBRIS}} = \sum_s \Xi_{\text{rot}}(s) \quad (1)$$

where  $\Xi_{\text{rot}}(s)$  is the partition function for the molecule in a specific binding state  $s = \{s_1, s_2, \dots, s_N\}$ . For simplicity, let us suppose that all the  $N-1$  bonds hold two protonating sites at their ends.

The partition function for every 'frozen' binding configuration can then be expressed as a the RIS partition function but decorating the transfer matrices with suitable binding parameters.  $\Xi_{\text{rot}}(s)$  adopts the form [1, 2, 3]

$$\Xi_{\text{rot}}(s) = \mathbf{p} \prod_{i=1}^{N-1} \mathbf{U}_i^{s_i s_{i+1}} \mathbf{q}^T \quad (2)$$

In the simplest case  $\mathbf{U}_i^{00} = \mathbf{U}_i^{10}$ ;  $\mathbf{U}_i^{01} = z \cdot \mathbf{U}_i$  and  $\mathbf{U}_i^{11} = z \cdot \mathbf{U}_i \mathbf{u}_i$  where  $\mathbf{U}_i$  are the transfer matrices typical of the RIS model for a symmetric polymer

$$\mathbf{U}_i = \begin{pmatrix} 1 & \sigma & \sigma \\ 1 & \sigma\psi & \sigma\omega \\ 1 & \sigma\omega & \sigma\psi \end{pmatrix}_i \quad (3)$$

where  $z$  is the reduced activity of the site and  $\mathbf{u}$  is a diagonal matrix containing the Boltzmann factors corresponding to the short range interactions between

charged sites

$$\mathbf{u}_i = \begin{pmatrix} u_t & 0 & 0 \\ 0 & u_g & 0 \\ 0 & 0 & u_g \end{pmatrix}_i \quad (4)$$

$-k_B T \ln u_t$  and  $-k_B T \ln u_g$  represent the short range interaction energy between two sites separated by a bond in *trans* and *gauche* conformation, respectively. The next step is to calculate the sum in Eqn. (1), which can be done using the identity

$$\sum_s \left( \prod_{i=1}^{N-1} \mathbf{U}^{s_i s_{i+1}} \right) = (\mathbf{E} \mathbf{E}) \prod_{i=1}^{N-1} \begin{pmatrix} \mathbf{U}_i^{00} & \mathbf{U}_i^{01} \\ \mathbf{U}_i^{10} & \mathbf{U}_i^{11} \end{pmatrix} \begin{pmatrix} \mathbf{E} \\ \mathbf{E} \end{pmatrix} \quad (5)$$

where  $\mathbf{E}$  is the  $3 \times 3$  identity matrix. Combining Eqns. (5), (1) and (2), we obtain the SBRIS partition function.

$$\Xi_{\text{SBRIS}} = \mathbf{s} \prod_{i=1}^{N-1} \begin{pmatrix} \mathbf{U}_i^{00} & \mathbf{U}_i^{01} \\ \mathbf{U}_i^{10} & \mathbf{U}_i^{11} \end{pmatrix} \mathbf{t}^T \quad (6)$$

where  $\mathbf{s} = (\mathbf{p} \mathbf{p})$  and  $\mathbf{t} = (\mathbf{q} \mathbf{q})$ . Note that the SBRIS partition function is obtained from the RIS partition function by replacing

$$\mathbf{U} \rightarrow \begin{pmatrix} \mathbf{U} & \mathbf{U}z \\ \mathbf{U} & \mathbf{U}z \end{pmatrix}; \quad \mathbf{p} \rightarrow (\mathbf{p} \mathbf{p}); \quad \mathbf{q} \rightarrow (\mathbf{q} \mathbf{q})$$

It can be easily shown that if some of the matrices in Eqn. (2) does not depend on any index  $s_i$ , the proper substitution is

$$\mathbf{U} \rightarrow \begin{pmatrix} \mathbf{U} & \mathbf{0} \\ \mathbf{0} & \mathbf{U} \end{pmatrix} \quad (7)$$

which can be necessary for the transfer matrices corresponding to bonds which do not hold any ionizable site.

## 2 Calculation of the mean square distance between two nodes of the chain

The matrix summation trick used above can also be applied to calculate other physical quantities which become pH-dependent in the SBRIS approach. Let  $f(c, s)$  be any quantity and  $\langle f(c, s) \rangle$  its SBRIS thermal average. Then

$$\langle f(c) \rangle = \sum_{s,c} f(c) \frac{e^{-\beta F(s,c)}}{\Xi_{\text{SBRIS}}} = \sum_s \pi(s) \left( \sum_c \frac{f(c) e^{-\beta F(s,c)}}{\Xi_{\text{rot}}(s)} \right) = \sum_s \pi(s) \langle f(c, s) \rangle_c \quad (8)$$

where

$$\pi(s) = \frac{\Xi_{\text{rot}}(s)}{\Xi_{\text{SBRIS}}}$$

represents the probability of a protonation state  $s$  and  $\langle f(c, s) \rangle_c$  is the average for that fixed protonation state. Note now that the quantity between brackets in Eqn. (8) represents a typical RIS average which can be calculated using the (conveniently decorated) transfer matrices  $\mathbf{U}_i^{s_i s_{i+1}}$ . In particular, matricial expressions for the mean square distance between two nodes,  $k$  and  $l$ , of a linear chain are available [1, 4]. For a fixed ionization state, the result is

$$\langle d_{kl}^2 \rangle (s) = \frac{2}{\Xi_{\text{rot}}(s)} \mathbf{p} \prod_{i=1}^k \mathbf{U}_i^{s_i s_{i+1}} [\mathbf{E} \mathbf{0} \mathbf{0} \mathbf{0} \mathbf{0}] \prod_{r=k+1}^{l-k} \mathbf{G}_r^{s_r s_{r+1}} \begin{bmatrix} \mathbf{0} \\ \mathbf{0} \\ \mathbf{0} \\ \mathbf{0} \\ \mathbf{E} \end{bmatrix} \prod_{j=l+1}^{N-1} \mathbf{U}_j^{s_j s_{j+1}} \mathbf{q} \quad (9)$$

where the matrices  $\mathbf{G}$  are proper super-matrices which can be expressed in terms of the transfer matrices  $\mathbf{U}_i^{s_i s_{i+1}}$ , the translation matrices and the bond vectors. The details and derivations are given in the Chapter 4 of the classical Flory's book [1] (see Eqn. 35). Introducing (9) in (8) and using the summation (5),  $\langle d_{kl}^2 \rangle$  is calculated as a function of the pH.

### 3 Minimal symmetric polyelectrolyte model

The model used in this work to illustrate the LEIP method consists of a polyelectrolyte like the one in Fig. 2b. In this molecule the ionizable sites are separated by three bonds **a**, **b** and **c**. The structure is very similar to poly(oxyethylene) and the corresponding transfer matrices are given can be found in [1, 3]

$$\mathbf{U}_a = \begin{pmatrix} 1 & \sigma_a & \sigma_a \\ 1 & \sigma_a \psi & \sigma_a \omega \\ 1 & \sigma_a \omega & \sigma_a \psi \end{pmatrix}; \quad \mathbf{U}_b = \begin{pmatrix} 1 & \sigma_a & \sigma_a \\ 1 & \sigma_a \psi' & \sigma_a \omega' \\ 1 & \sigma_a \omega' & \sigma_a \psi' \end{pmatrix}; \quad \mathbf{U}_c = \begin{pmatrix} 1 & \sigma & \sigma \\ 1 & \sigma \psi & \sigma \omega \\ 1 & \sigma \omega & \sigma \psi \end{pmatrix}$$

The conformational model here used can be obtained by taking  $\sigma_a = 0$ , which assures that the **a** and **b** bonds are always in the *trans* state, and  $\omega = \psi = \omega' = \psi' = 1$ , which means that the bonds of the deprotonated molecule are independent.

### References

- [1] Flory, P. L. *Statistical Mechanics of Chain Molecules*; John Wiley: New York, 1969.
- [2] Garcés, J. L.; Koper, G. J. M.; Borkovec, M. Ion binding to polyelectrolytes. *J. Phys. Chem. B* **2006**, *110*, 10937-10950.
- [3] Garcés, J. L.; Madurga, S.; Borkovec, M. Coupling of conformational and ionization equilibria in linear poly(ethylenimine): A study based on the site

binding/rotational isomeric state (SBRIS) model. *Phys. Chem. Chem. Phys.*, **2014**, *16*, 4626-4638.

- [4] Flory P. J. ; Jernigan R. L. Second and fourth moments of chain molecules. *J. Chem. Phys.* **1965**, *42*, 3509-3519.
